# Supplementary material for: Photoluminescence and electroluminescence characterization of high-performance near-infrared emitters based on 1,5-naphthyridin-4-ol-containing heteroleptic platinum(ii) complexes
Source: Royal Society of Chemistry journal article supplement (doi:10.1039/d1ma00141h), 2021-01-01
Supplement: d1ma00141h1.pdf [file d1ma00141h1.pdf]

**Electronic Supporting Information**

**Photoluminescence and Electroluminescence  
Characterization of High Performance Near-Infrared  
Emitters Based on 1,5-Naphthyridin-4-ol Containing  
Heteroleptic Platinum (II) Complexes**

Hagos Tesfay Kidanu,<sup>abc</sup> Jian Haur Lee<sup>abc</sup> and Chin-Ti Chen<sup>\*a</sup>

<sup>a</sup> Institute of Chemistry, Academia Sinica, Taipei 11529, Taiwan, Republic of China.

Email: chintchen@gate.sinica.edu.tw; Fax: +886 2 27831237; Tel: + 886 2 55728542.

<sup>b</sup> Sustainable Chemical Science and Technology (SCST), Taiwan International Graduate Program (TIGP), Academia Sinica, Taipei 11529, Taiwan, Republic of China.

<sup>c</sup> Department of Applied Chemistry, National Yang Ming Chiao Tung University, Hsinchu 30050, Taiwan, Republic of China.

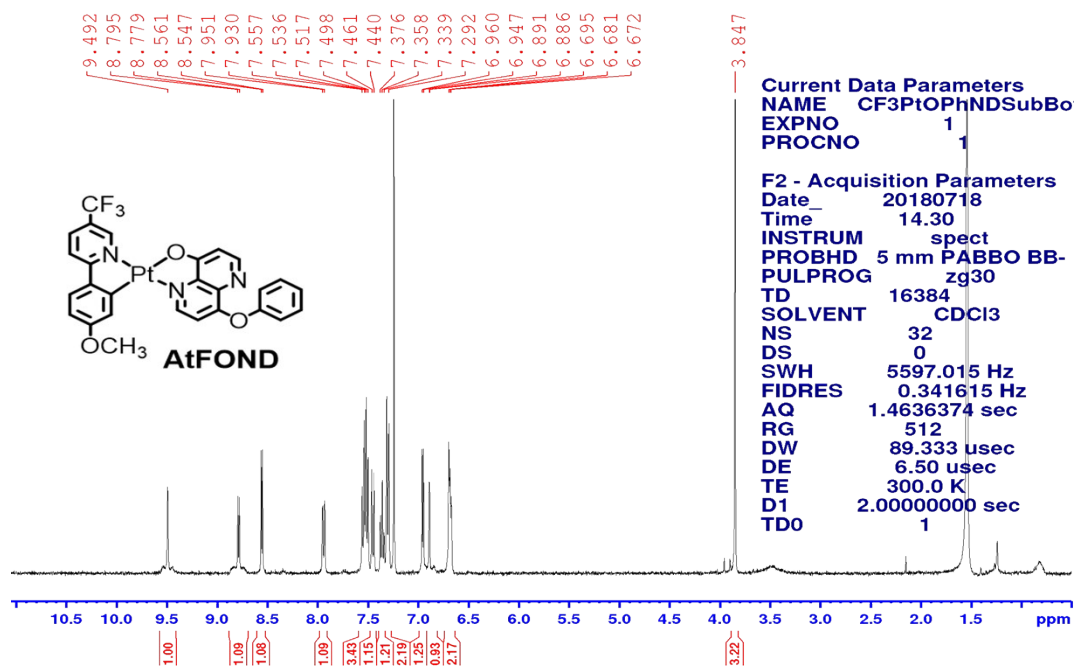

**Figure S1.**  $^1\text{H}$  NMR spectrum of AtFOND (400 MHz,  $\text{CDCl}_3$ ).

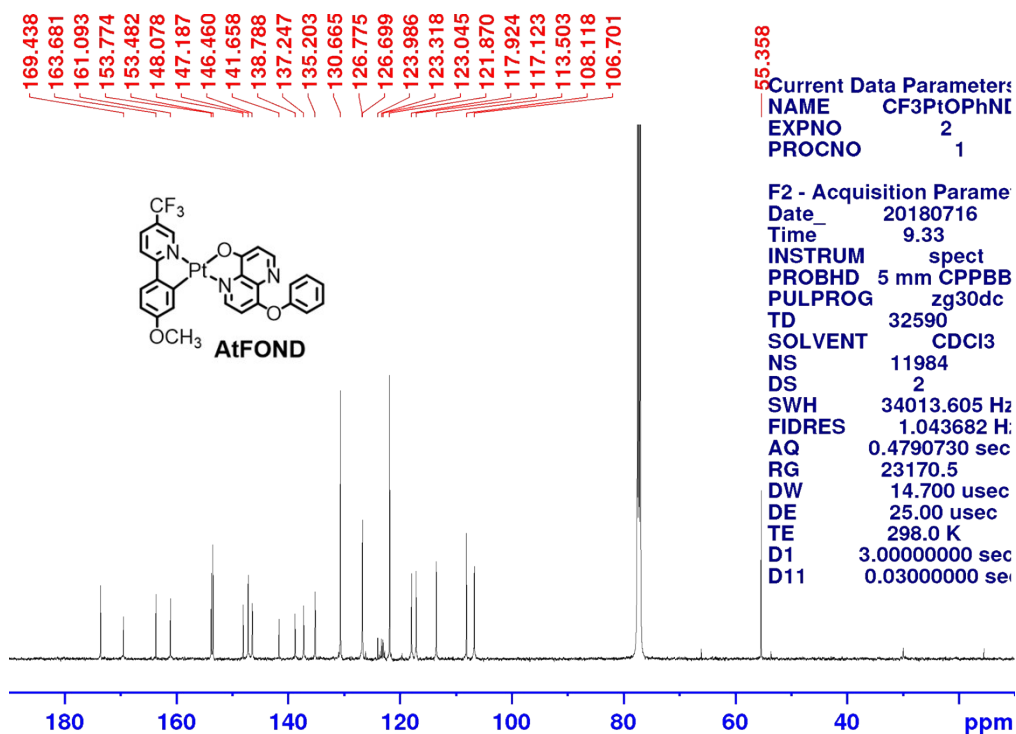

**Figure S2.**  $^{13}\text{C}$  NMR spectrum of AtFOND (125 MHz,  $\text{CDCl}_3$ ).

trans-AtFOND (HR-FAB)

[Mass Spectrum]  
Data : 20200623\_trans-AtFOND-HR-001 Date: 23-Jun-2020 16:53  
Sample : trans-AtFOND  
Note : NBA  
Ion Mode : FAB+  
RT : 0.55 min Scan# : 10  
Elements : C 1000/0, H 1000/0, F 3/3, N 3/3, O 3/3, Pt 1/1  
Mass Tolerance : 50mmu  
Unsaturation (U.S.) : -0.5 - 1000.0

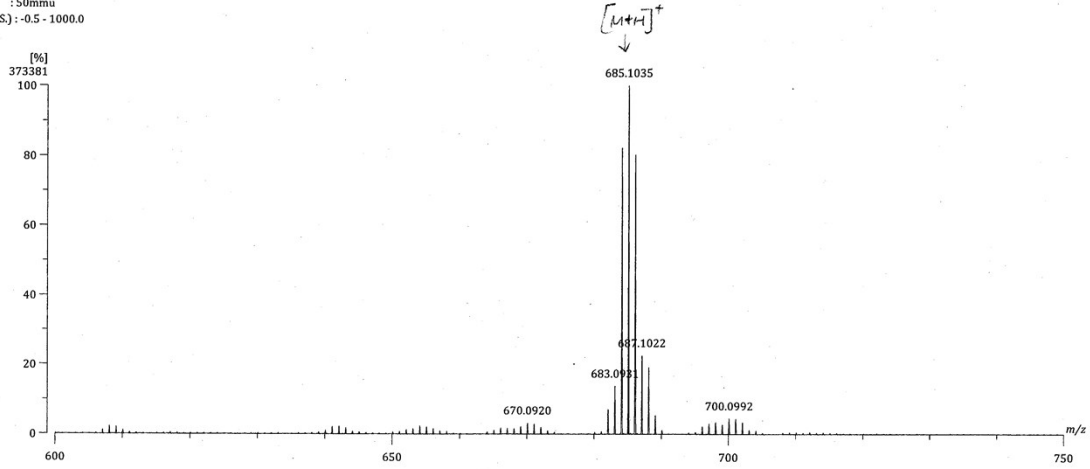

| Observed m/z | Int%   | Err [ppm / mmu] | U.S. Composition                    |
|--------------|--------|-----------------|-------------------------------------|
| 1 685.1035   | 100.00 | +1.3 / +0.9     | 18.5 C27 H19 F3 N3 O3 Pt = 685.1026 |

Figure S3. HR-MS spectrum of AtFOND.

[Mass Spectrum]  
Data : 20180626\_ht136b-001 Date: 26-Jun-2018 15:26  
Instrument : JMS-700  
Sample : ht136b  
Note : NBA  
Inlet : Direct Ion Mode : FAB+  
Spectrum Type : Normal Ion [MF-Linear]  
RT : 0.00 min Scan# : (1.5) Temp : 3276.7 deg.C  
BP : m/z 700.1743 Int. : 563.02 (5903680)  
Output m/z range : 300 to 1100 Cut Level : 0.00 %

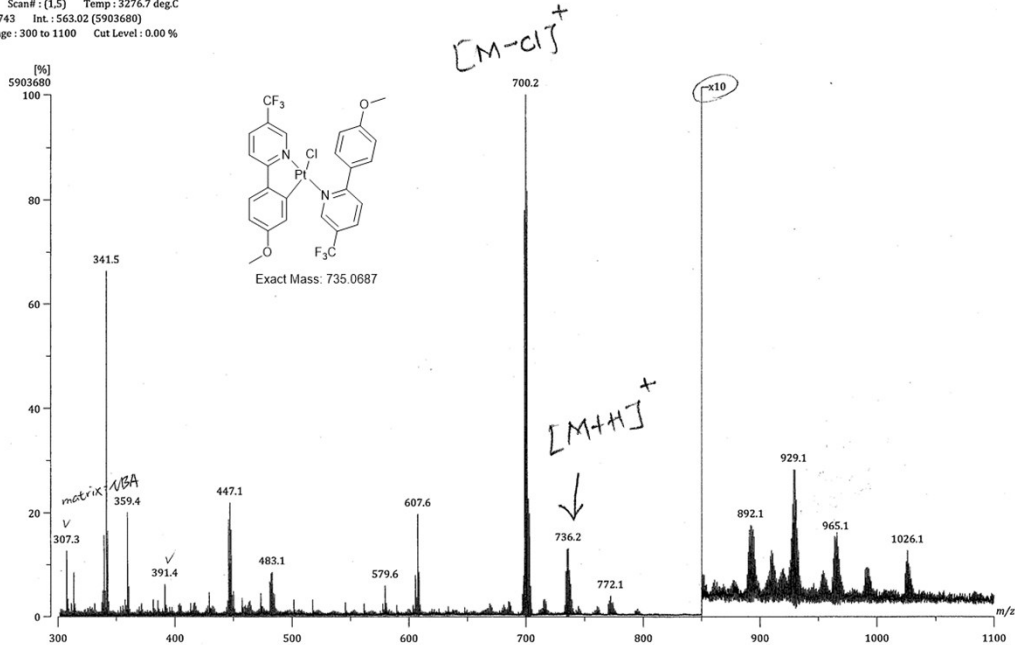

Figure S4. FAB-MS spectrum of (AtF)<sub>2</sub>PtCl.

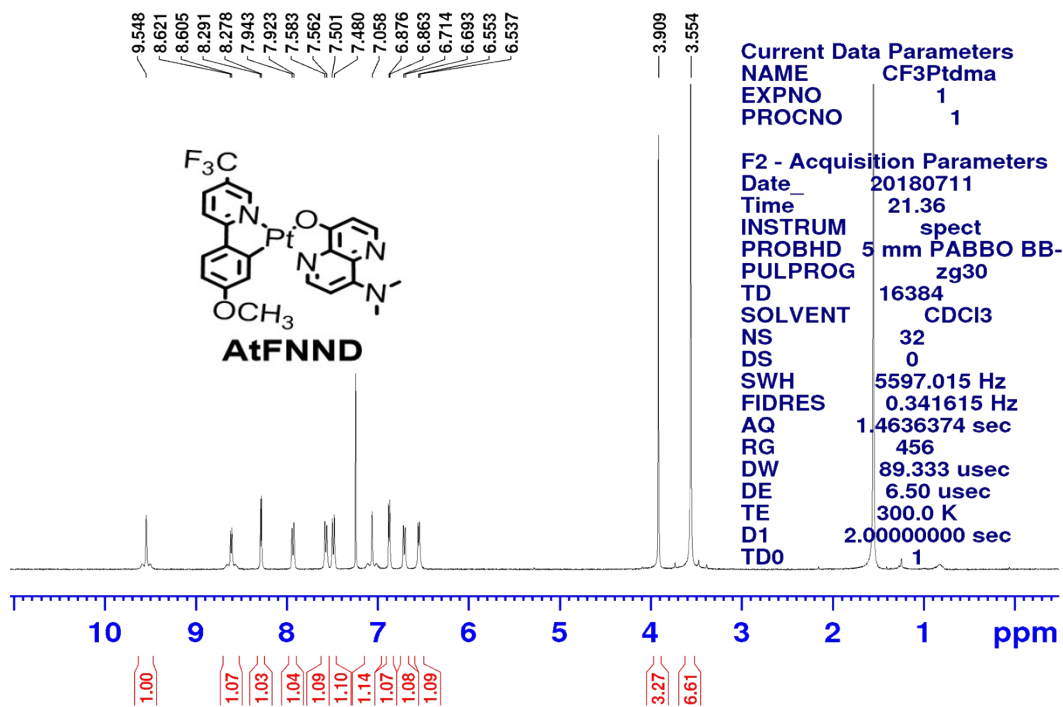

Figure S5. <sup>1</sup>H NMR spectrum of AtFNND (400 MHz, CDCl<sub>3</sub>).

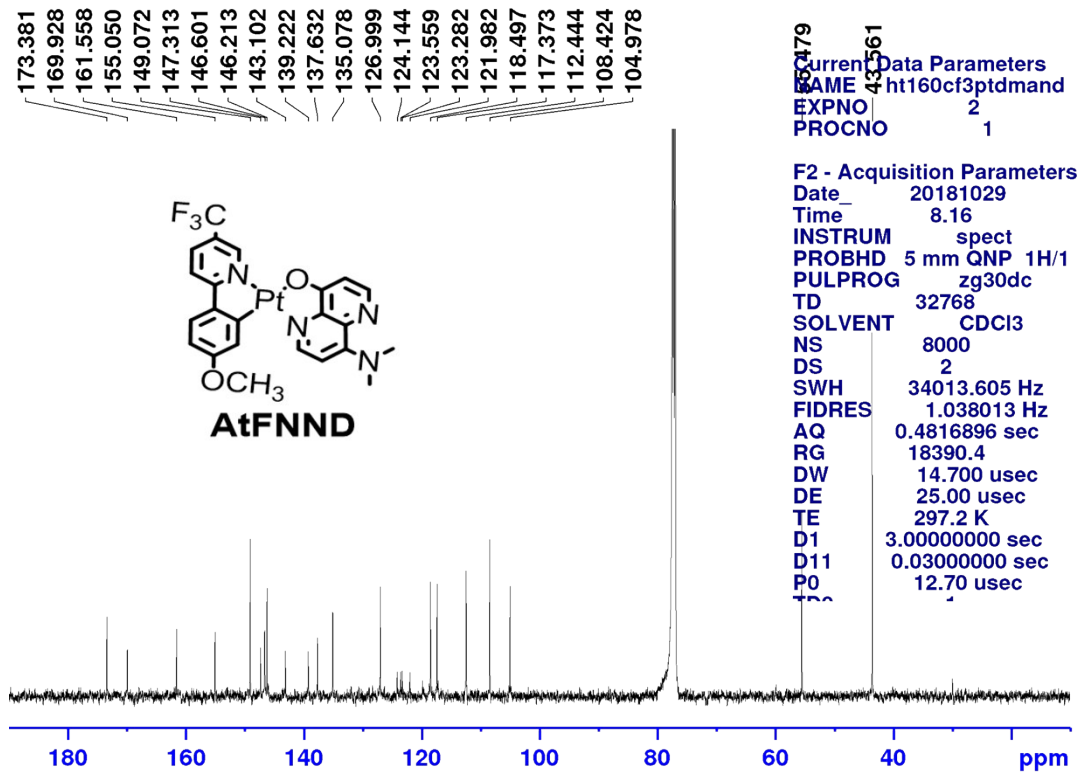

Figure S6. <sup>13</sup>C NMR spectrum of AtFNND (125 MHz, CDCl<sub>3</sub>).

[Mass Spectrum]  
 Data : 20200623\_AtFNND-HR-001 Date : 23-Jun-2020 16:36  
 Sample : AtFNND  
 Note : NBA  
 Ion Mode : FAB+  
 RT : 0.05 min Scan# : 2  
 Elements : C 1000/0, H 1000/0, F 3/3, N 4/4, O 2/2, Pt 1/1  
 Mass Tolerance : 50mmu  
 Unsaturation (U.S.) : -0.5 - 1000.0

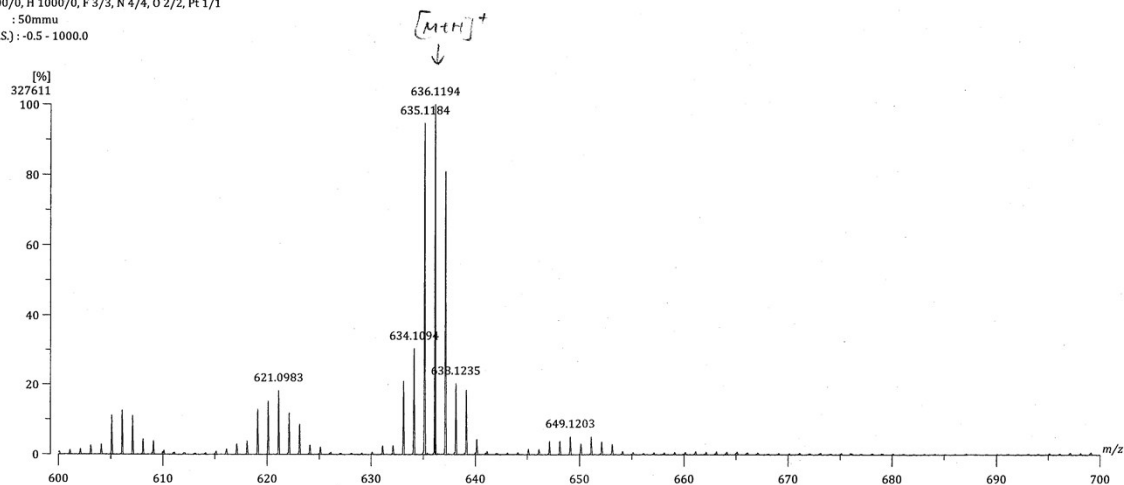

| Observed m/z | Int%   | Err [ppm / mmu] | U.S. Composition                    |
|--------------|--------|-----------------|-------------------------------------|
| 1 636.1194   | 100.00 | +1.2 / +0.8     | 14.5 C23 H20 F3 N4 O2 Pt = 636.1186 |

Figure S7. HR-MS spectrum of AtFNND.

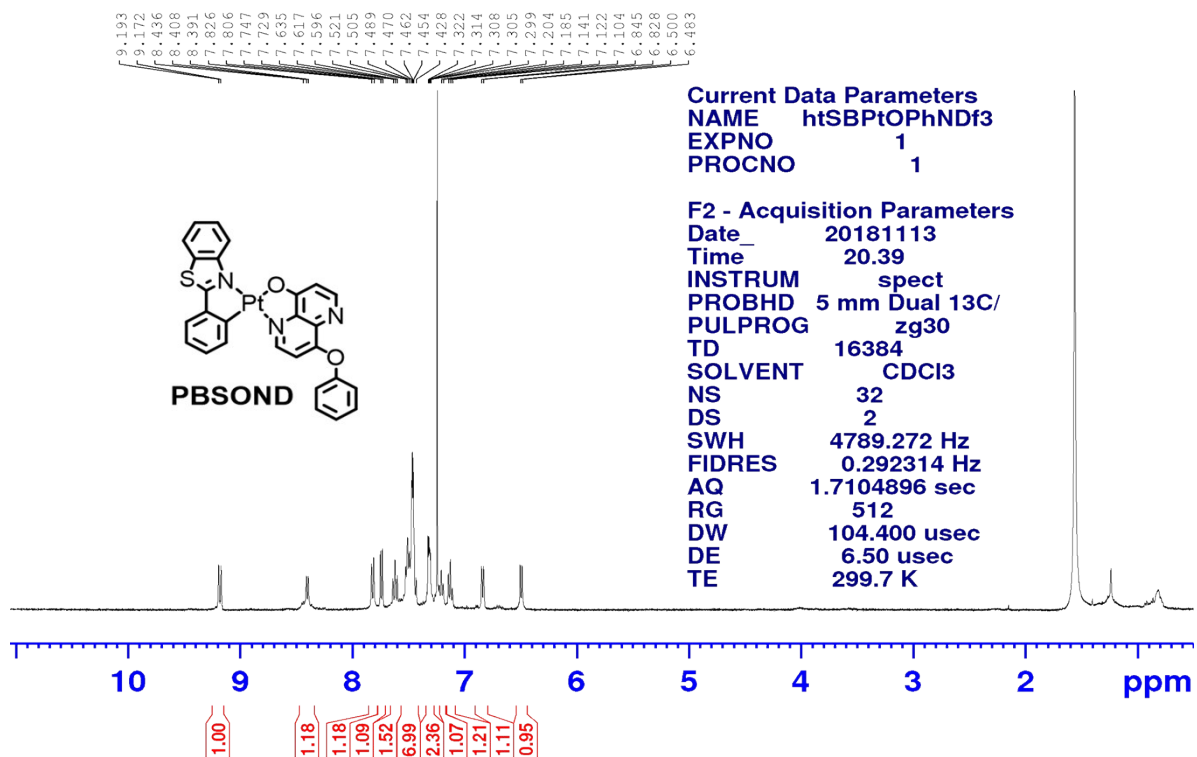

Figure S8. <sup>1</sup>H NMR spectrum of PBSOND (400 MHz, CDCl<sub>3</sub>).

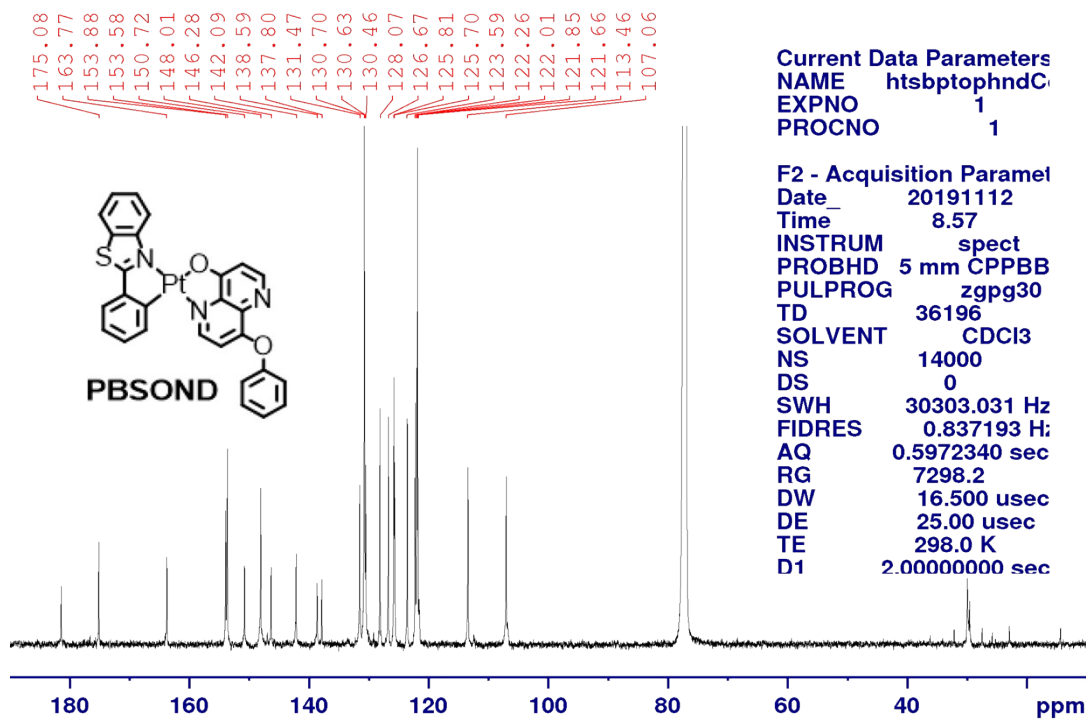

**Figure S9.**  $^{13}\text{C}$  NMR spectrum of **PBSOND** (125 MHz,  $\text{CDCl}_3$ ).

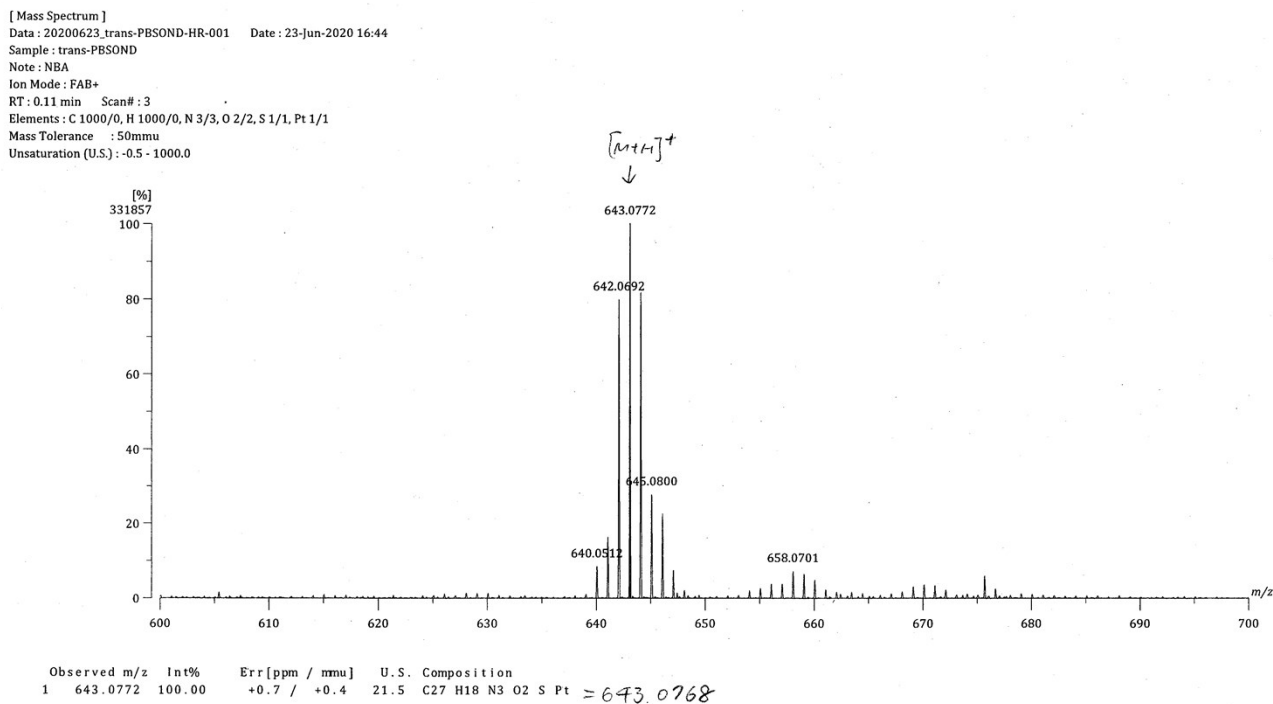

**Figure S10.** HR-MS spectrum of **PBSOND**.

[Mass Spectrum]  
 Data : 20181120\_HT163-002 Date: 20-Nov-2018 16:25  
 Instrument : JMS-700  
 Sample : HT163  
 Note : NBA  
 Inlet : Direct Ion Mode : FAB+  
 Spectrum Type : Normal Ion [MF-Linear]  
 RT : 0.00 min Scan# : (1,4) Temp : 3276.7 deg.C  
 BP : m/z 307.2733 Int. : 908.48 (9526075)  
 Output m/z range : 300 to 1300 Cut Level : 0.00 %

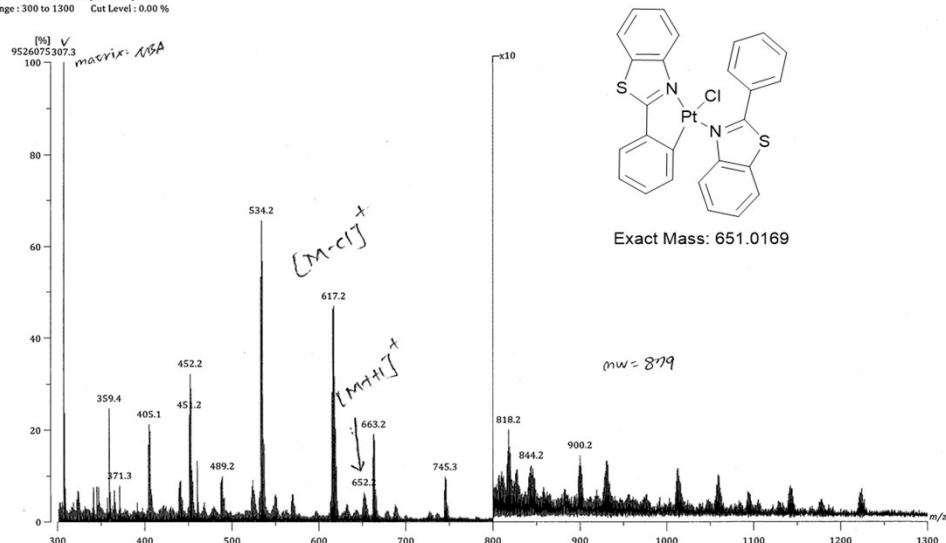

Figure S11. FAB-MS spectrum of  $(\text{PBS})_2\text{PtCl}$ .

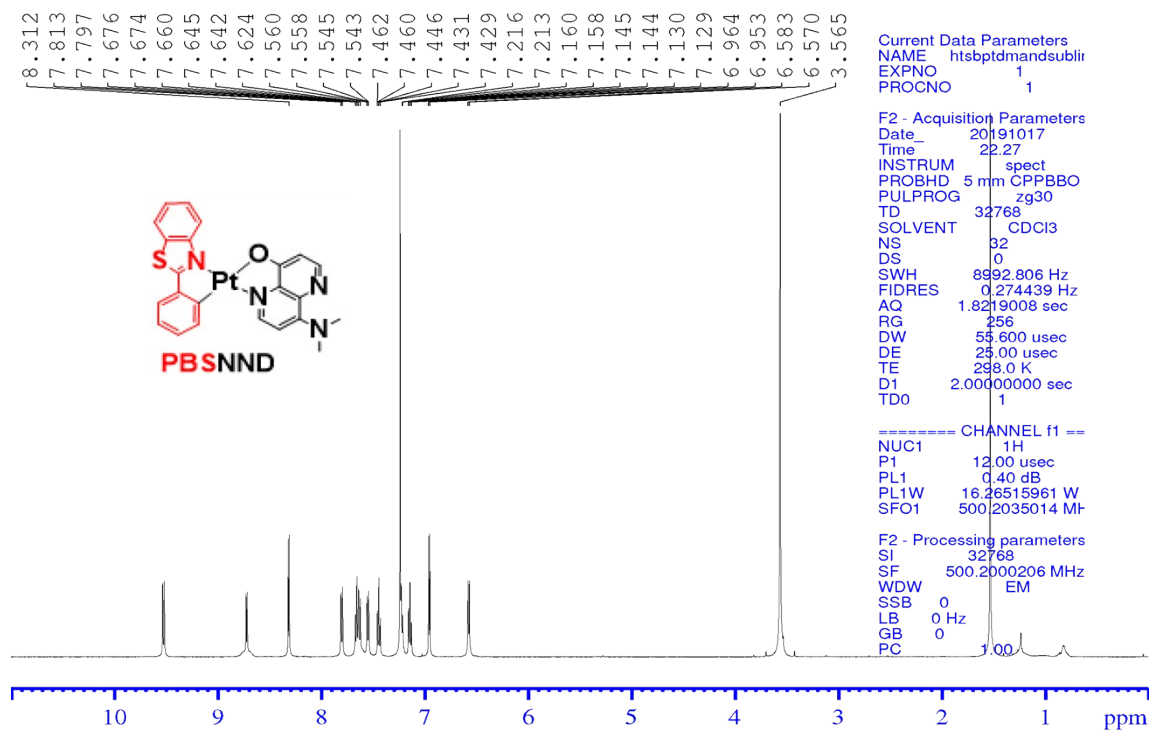

Figure S12.  $^1\text{H}$  NMR spectrum of **PBSNND** (400 MHz,  $\text{CDCl}_3$ ).

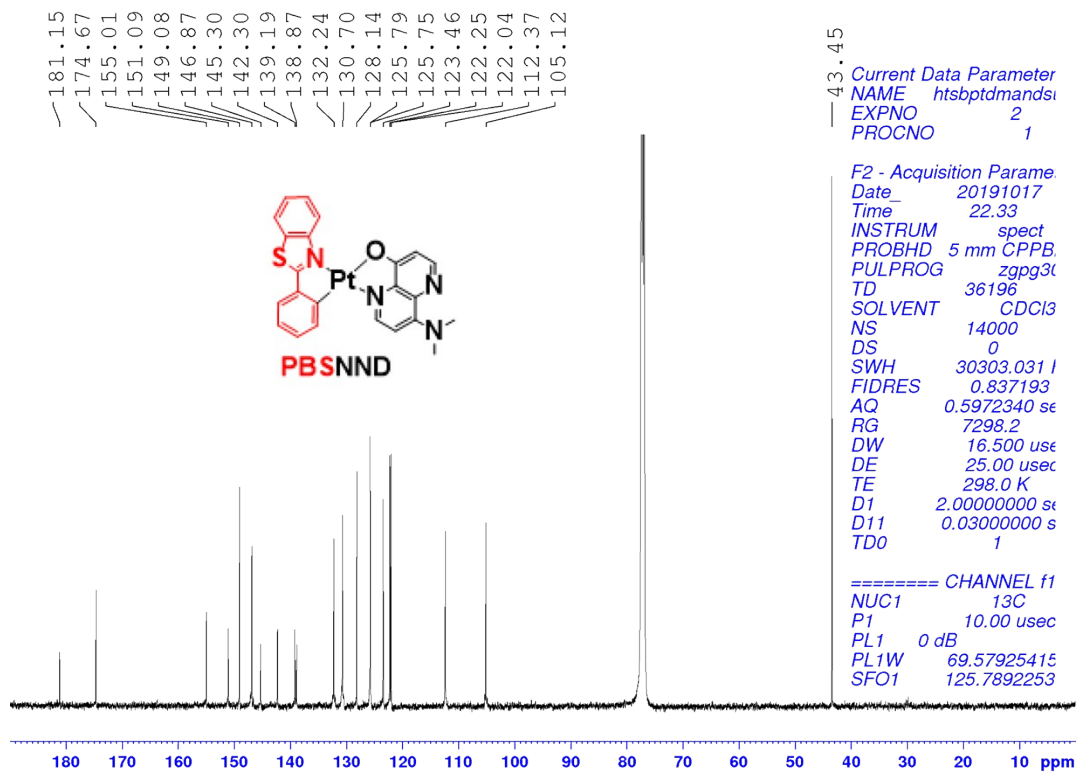

Figure S13. <sup>13</sup>C NMR spectrum of PBSNND (125 MHz, CDCl<sub>3</sub>).

[ Mass Spectrum ]  
 Data : 20200623\_PBSNND-HR-001 Date : 23-Jun-2020 16:31  
 Sample : PBSNND  
 Note : NBA  
 Ion Mode : FAB+  
 RT : 0.38 min Scan# : (8,10)  
 Elements : C 1000/0, H 1000/0, N 4/4, O 1/1, S 1/1, Pt 1/1  
 Mass Tolerance : 50mmu  
 Unsaturation (U.S.) : -0.5 - 1000.0

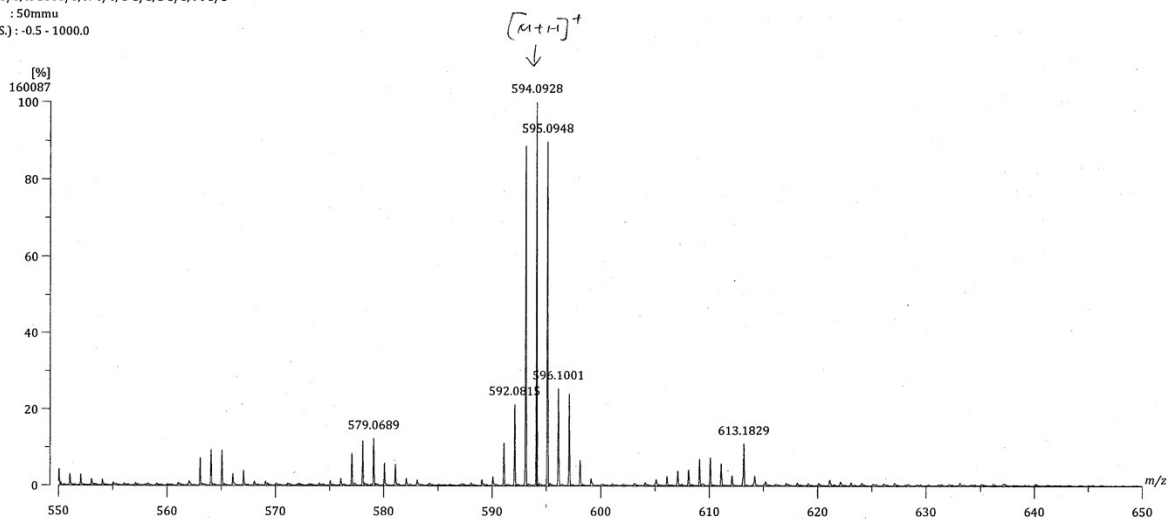

| Observed m/z | Int%   | Err [ppm / mmu] | U.S. Composition                  |
|--------------|--------|-----------------|-----------------------------------|
| 1 594.0928   | 100.00 | +0.1 / +0.1     | 17.5 C23 H19 N4 O S Pt = 594.0927 |

Figure S14. HR-MS spectrum of PBSNND.



**Table S1.** Comparison of selected geometric parameters of the studied platinum complexes.

| Pt complexes  |                      | Selected bond lengths (Å) |      |      |          |
|---------------|----------------------|---------------------------|------|------|----------|
|               |                      | Pt-N(1)                   | Pt-C | Pt-O | Pt-N(qn) |
| <b>AtFOND</b> | Crystal <sup>a</sup> | 1.99                      | 1.98 | 2.09 | 2.04     |
|               | DFT <sup>b</sup>     | 2.03                      | 2.01 | 2.14 | 2.07     |
| <b>AtFNND</b> | Crystal <sup>a</sup> | 2.00                      | 2.00 | 2.08 | 2.03     |
|               | DFT <sup>b</sup>     | 2.03                      | 2.02 | 2.13 | 2.07     |
| <b>PBSOND</b> | DFT <sup>b</sup>     | 2.06                      | 2.02 | 2.15 | 2.07     |
| <b>PBSNND</b> | Crystal <sup>a</sup> | 2.02                      | 1.99 | 2.10 | 2.01     |
|               | DFT <sup>b</sup>     | 2.06                      | 2.02 | 2.15 | 2.06     |

  

| Pt complexes  |                      | Selected bond angles (°) |           |            |            |               |        |
|---------------|----------------------|--------------------------|-----------|------------|------------|---------------|--------|
|               |                      | O-Pt-N(1)                | C-Pt-N(1) | C-Pt-N(qn) | O-Pt-N(qn) | N(1)-Pt-N(qn) | O-Pt-C |
| <b>AtFOND</b> | Crystal <sup>a</sup> | 92.7                     | 81.0      | 105.3      | 81.1       | 173.6         | 172.1  |
|               | DFT <sup>b</sup>     | 93.6                     | 80.5      | 106.6      | 79.6       | 171.6         | 172.7  |
| <b>AtFNND</b> | Crystal <sup>a</sup> | 92.1                     | 81.2      | 106.1      | 80.6       | 171.7         | 173.2  |
|               | DFT <sup>b</sup>     | 93.6                     | 80.6      | 106.8      | 79.3       | 171.8         | 173.1  |
| <b>PBSOND</b> | DFT <sup>b</sup>     | 97.9                     | 80.1      | 103.6      | 79.0       | 173.2         | 173.8  |
| <b>PBSNND</b> | Crystal <sup>a</sup> | 97.8                     | 80.8      | 101.8      | 80.5       | 173.4         | 172.4  |
|               | DFT <sup>b</sup>     | 98.1                     | 80.0      | 103.8      | 78.8       | 173.3         | 173.9  |

<sup>a</sup> Results obtained experimentally from the single crystal X-ray structure. <sup>b</sup> Results obtained by DFT calculation using b3lyp method for the ground state geometry .

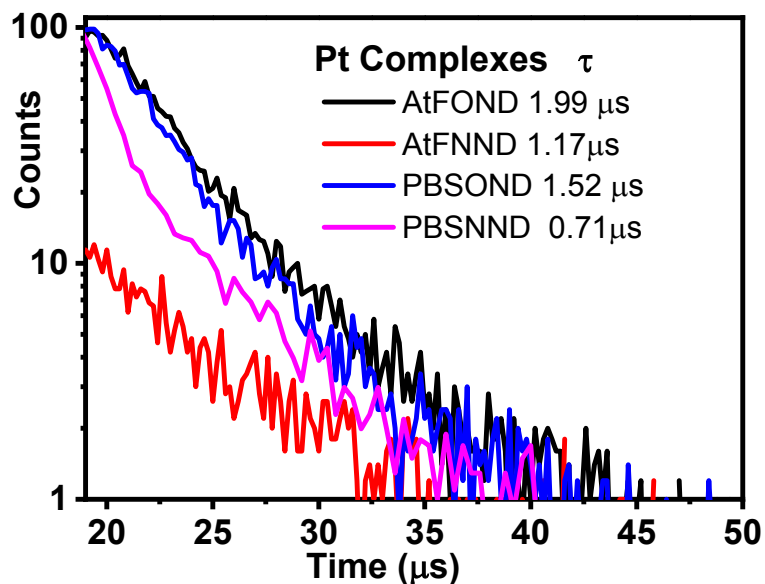**Figure S15.** Decay profile of the PL intensity of studied platinum complexes in degassed CH<sub>2</sub>Cl<sub>2</sub> at room temperatures.



## Theoretical studies

All of the calculations were performed with the Gaussian 16 program package. The geometry optimization of ground states of the studied Pt(II) complexes were simulated with DFT at the B3LYP/LANL2DZ (Pt) and B3LYP/6-31g(d,p) (H, C, N, S, O) levels using CH<sub>2</sub>Cl<sub>2</sub> as the solvent. The optimized structures of **AtFOND**, **AtFNND**, **PBSOND** and **PBSNND** complexes were used to calculate the 12 lowest singlet ( $S_0 \rightarrow S_{12}$ ) and triplet optical electronic transitions ( $S_0 \rightarrow T_{12}$ ) using the TD-DFT method. The solvent effect is based on the polarizable continuum model (PCM), which is implemented in the Gaussian 16 program. The contribution of a group to a molecular orbital was calculated within the framework of Mulliken population analysis using the AOMix program. The calculated optical absorption and emission transition characters of all the complexes in dichloromethane are summarized in Table S2. While the frontier molecular orbitals involved in the lower-lying transitions are depicted in Fig. 4.

**Table S2.** Calculated wavelengths and molecular orbitals character of the optical transitions for the studied platinum complexes in dichloromethane solvent

| Complex       | State                 | $\lambda$ (nm) | Main contribution of MOs (%) |
|---------------|-----------------------|----------------|------------------------------|
| <b>AtFOND</b> | $S_0 \rightarrow S_1$ | 432            | HOMO $\rightarrow$ LUMO (69) |
|               | $S_0 \rightarrow T_1$ | 507            | HOMO $\rightarrow$ LUMO (61) |
| <b>AtFNND</b> | $S_0 \rightarrow S_1$ | 454            | HOMO $\rightarrow$ LUMO (67) |
|               | $S_0 \rightarrow T_1$ | 505            | HOMO $\rightarrow$ LUMO (49) |
| <b>PBSOND</b> | $S_0 \rightarrow S_1$ | 435            | HOMO $\rightarrow$ LUMO (68) |
|               | $S_0 \rightarrow T_1$ | 519            | HOMO $\rightarrow$ LUMO (56) |
| <b>PBSNND</b> | $S_0 \rightarrow S_1$ | 438            | HOMO $\rightarrow$ LUMO (66) |
|               | $S_0 \rightarrow T_1$ | 508            | HOMO $\rightarrow$ LUMO (40) |

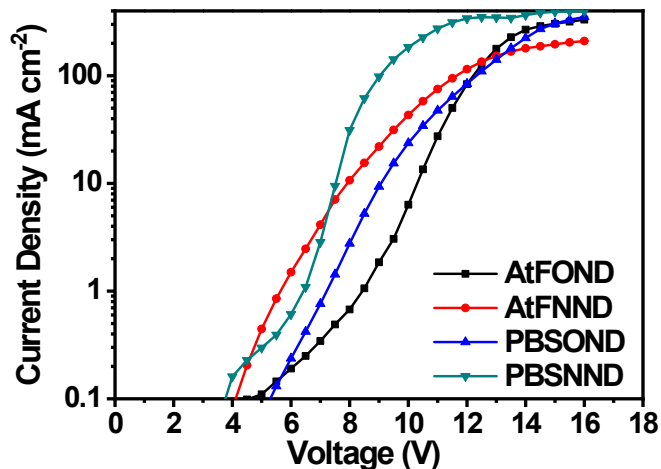

**Fig. S17.** The current density and voltage characteristics of four NIR platinum complex OLEDs.

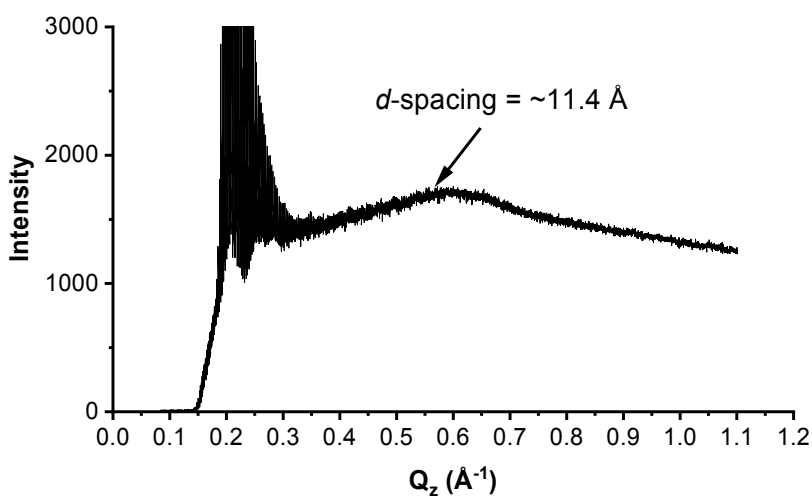

**Figure S18.** 1D GIWAXS spectrum of **PBSNND** along the direction of  $Q_z$  (out-of-plane direction to the substrate) extracted from the corresponding 2D GIWAXS patterns (Fig. 10). The corresponding  $d$ -spacing,  $d = 2\pi/Q_z$ .
